# Supplementary material for: Greek Translation, Cultural Adaptation and Validation of the Mini Sarcopenia Risk Assessment Questionnaire, to Evaluate Sarcopenia in Greek Elderly at a Hospital Setting
Source: MDPI journal article supplement (doi:10.3390/nursrep13010037), 2023-03-03
Supplement: s1 [file s1]

**Table S1.** MSRA-7 and MSRA-5 questionnaires.

|                                                                                                                      | 7 items | 5 items |
|----------------------------------------------------------------------------------------------------------------------|---------|---------|
| 1-How old are you?                                                                                                   | Score   | Score   |
| ≥70 years                                                                                                            | 0       | 0       |
| <70 years                                                                                                            | 5       | 5       |
| 2-Were you hospitalized in the last year?                                                                            |         |         |
| Yes, and more than one hospitalization                                                                               | 0       | 0       |
| Yes, one hospitalization                                                                                             | 5       | 10      |
| No                                                                                                                   | 10      | 15      |
| 3-What is your activity level?                                                                                       |         |         |
| I'm able to walk less than 1000 meters                                                                               | 0       | 0       |
| I'm able to walk more than 1000 meters                                                                               | 5       | 15      |
| 4-Do you eat 3 meals per day regularly?                                                                              |         |         |
| No, up to twice per week I skip a meal (for example I skip breakfast or I have only milky coffee or soup for dinner) | 0       | 0       |
| Yes                                                                                                                  | 5       | 15      |
| 5-Do you consume any of the following?                                                                               |         |         |
| Milk or dairy products (yogurt, cheese), but not every day                                                           | 0       | -       |
| Milk or dairy products (yogurt, cheese) at least once per day                                                        | 5       | -       |
| 6- Do you consume any of the following?                                                                              |         |         |
| Poultry, meat, fish, eggs, legumes, ragout or ham, but not every day                                                 | 0       | -       |
| Poultry, meat, fish, eggs, legumes, ragout or ham at least once per day                                              | 5       | -       |
| 7-Did you lose weight in the last year?                                                                              |         |         |
| >2 kg                                                                                                                | 0       | 0       |
| ≤2 kg                                                                                                                | 5       | 10      |

Adopted from Rossi et al. [1].

**Table S2.** Σύνοψη εκτίμηση επικινδυνότητας της Σαρκοπενίας (7 και 5 ερωτήσεων).

|                                              | 7 ερωτήσεις | 5 ερωτήσεις |
|----------------------------------------------|-------------|-------------|
|                                              | Σκορ        | Σκορ        |
| <b>1. Πόσο χρονών είστε;</b>                 |             |             |
| ≥ 70 ετών                                    | 0           | 0           |
| < 70 ετών                                    | 5           | 5           |
| <b>2. Νοσηλευτήκατε τον περασμένο χρόνο;</b> |             |             |
| - Ναι, και περισσότερες από μία νοσηλεία     | 0           | 0           |
| - Ναι, μία νοσηλεία                          | 5           | 10          |

|                                                                                                                                                 |    |    |
|-------------------------------------------------------------------------------------------------------------------------------------------------|----|----|
| - Όχι                                                                                                                                           | 10 | 15 |
| <b>3. Ποιο είναι το επίπεδο δραστηριότητάς σας;</b>                                                                                             |    |    |
| - Μπορώ να περπατήσω λιγότερο από 1000 μέτρα                                                                                                    | 0  | 0  |
| - Μπορώ να περπατήσω πάνω από 1000 μέτρα                                                                                                        | 5  | 15 |
| <b>4. Τρώτε τακτικά 3 γεύματα την ημέρα;</b>                                                                                                    |    |    |
| - Όχι, έως και δύο φορές την εβδομάδα παραλείπω ένα γεύμα<br>(για παράδειγμα παραλείπω το πρωινό<br>ή έχω μόνο καφέ με γάλα ή σούπα για δείπνο) | 0  | 0  |
| - Ναι                                                                                                                                           | 5  | 15 |
| <b>5. Καταναλώνετε κάποιο από τα παρακάτω;</b>                                                                                                  |    |    |
| - Γάλα ή γαλακτοκομικά προϊόντα (π.χ. γιαούρτι, τυρί), αλλά<br>όχι κάθε μέρα                                                                    | 0  | -  |
| - Γάλα ή γαλακτοκομικά προϊόντα (π.χ. γιαούρτι, τυρί)<br>τουλάχιστον μία φορά την ημέρα                                                         | 15 | -  |
| <b>6. Καταναλώνετε οτιδήποτε από τα παρακάτω;</b>                                                                                               |    |    |
| - Πουλερικά, κρέας, ψάρι, αυγά, όσπρια,<br>κοκκινιστά ή ζαμπόν, αλλά όχι κάθε μέρα                                                              | 0  | -  |
| - Πουλερικά, κρέας, ψάρι, αυγά, όσπρια,<br>κοκκινιστά ή ζαμπόν τουλάχιστον μία φορά την ημέρα                                                   | 5  | -  |
| <b>7. Χάσατε βάρος το προηγούμενο έτος;</b>                                                                                                     |    |    |
| > 2 κιλά                                                                                                                                        | 0  | 0  |
| ≤ 2 κιλά                                                                                                                                        | 5  | 10 |

**Table S3. SARC-F questionnaire.**

| <b>Component</b>      | <b>Question</b>                                                    | <b>Scoring</b>                                      |
|-----------------------|--------------------------------------------------------------------|-----------------------------------------------------|
| Strength              | How much difficulty do you have in lifting and carrying 10 pounds? | None= 0<br>Some=1<br>A lot or unable=2              |
| Assistance in walking | How much difficulty do you have walking across a room?             | None= 0<br>Some=1<br>A lot, use aids or unable=2    |
| Rise from a chair     | How much difficulty do you have transferring from a chair to bed?  | None= 0<br>Some=1<br>A lot or unable without help=2 |
| Climb stairs          | How much difficulty do you have climbing a flight of 10 stairs?    | None= 0<br>Some=1<br>A lot or unable=2              |
| Falls                 | How many times have you fallen in the past year?                   | None= 0<br>1-3 falls=1<br>4 or more falls=2         |

Reprinted/adapted from Malmstrom et Morley [2]

## Reference

1. Rossi, A.P.; Micciolo, R.; Rubele, S.; Fantin, F.; Caliri, C.; Zoico, E.; Mazzali, G.; Ferrari, E.; Volpato, S.; Zamboni, M. Assessing the risk of sarcopenia in the elderly: The Mini Sarcopenia Risk Assessment (MSRA) Questionnaire. *J. Nutr. Health Aging* **2017**, *21*, 743–749. <https://doi.org/10.1007/S12603-017-0921-4>.
2. Malmstrom, T.K.; Morley, J.E. SARC-F: A simple questionnaire to rapidly diagnose sarcopenia. *J. Am. Med. Dir. Assoc.* **2013**, *14*, 531–532. <https://doi.org/10.1016/j.jamda.2013.05.018>.
